# Supplementary material
Source: HighWire-hosted journal article supplement (https://erj.ersjournals.com/content/59/3/2100651)
Supplement: inline-supplementary-material-2 [file inline-supplementary-material-2.pdf]

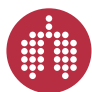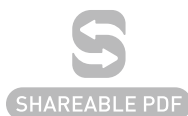

# In-hospital and midterm post-discharge complications of adults hospitalised with respiratory syncytial virus infection in France, 2017–2019: an observational study

Alexandre Descamps<sup>1</sup>, Nezha Lenzi<sup>2</sup>, Florence Galtier<sup>2,3</sup>, Fabrice Lainé<sup>2,4</sup>, Zineb Lesieur<sup>2</sup>, Philippe Vanhems<sup>2,5,6</sup>, Sélilah Amour<sup>5,6</sup>, Anne-Sophie L'Honneur<sup>7</sup>, Nadhira Fidouh<sup>8</sup>, Vincent Foulongne<sup>9</sup>, Gisèle Lagathu<sup>10</sup>, Xavier Duval<sup>2,11,12</sup>, Corinne Merle<sup>13</sup>, Bruno Lina<sup>14</sup>, Fabrice Carrat<sup>15</sup>, Odile Launay<sup>1,2,17</sup> and Paul Loubet<sup>2,16,17</sup>, on behalf of the FLUVAC study group

<sup>1</sup>Université de Paris, Inserm CIC 1417, Assistance Publique Hôpitaux de Paris, Hôpital Cochin, CIC Cochin Pasteur, Paris, France. <sup>2</sup>Inserm, F-CRIN, Innovative Clinical Research Network in Vaccinology (I-REIVAC), Paris, France. <sup>3</sup>Inserm CIC 1411, Montpellier University Hospital, Montpellier, France. <sup>4</sup>Inserm CIC 1414, CHU Rennes, Rennes, France. <sup>5</sup>Service Hygiène, Epidémiologie, Infectiologie et Prévention, Centre Hospitalier Edouard Herriot, Hospices Civils de Lyon, Lyon, France. <sup>6</sup>CIRI, Centre International de Recherche en Infectiologie (Equipe Laboratoire des Pathogènes Emergents), Université Lyon, Inserm, U1111, Université Claude Bernard Lyon 1, CNRS, UMR5308, Lyon, France. <sup>7</sup>Service de Virologie, Hôpital Cochin, Paris, France. <sup>8</sup>Laboratoire de Virologie, Hôpital Bichat, Paris, France. <sup>9</sup>Service de Virologie, CHU Montpellier, Hôpital Saint Eloi, Montpellier, France. <sup>10</sup>Laboratoire de Virologie, Pôle Micro-organismes, CHU Rennes, Rennes, France. <sup>11</sup>Assistance Publique Hôpitaux de Paris, Hôpital Bichat, Centre d'Investigation Clinique, Inserm CIC 1425, Paris, France. <sup>12</sup>Université de Paris, IAME, Inserm, Paris, France. <sup>13</sup>Infectious Diseases Dept, Montpellier University Hospital, Montpellier, France. <sup>14</sup>Hospices Civils de Lyon, Laboratoire de Virologie, Institut des Agents Infectieux (IAI), Centre National de Référence des Virus Respiratoires France Sud, Hôpital de la Croix-Rousse, Lyon, France. <sup>15</sup>Sorbonne Université, Inserm, Institut Pierre Louis d'Epidémiologie et de Santé Publique (IPLESP), Assistance Publique Hôpitaux de Paris, Hôpital Saint Antoine, Paris, France. <sup>16</sup>VBMI, Inserm U1047, Dept of Infectious and Tropical Disease, CHU Nîmes, Université de Montpellier, Nîmes, France. <sup>17</sup>Last authors contributed equally to this article.

Corresponding author: Paul Loubet ([Paul.LOUBET@chu-nimes.fr](mailto:Paul.LOUBET@chu-nimes.fr))

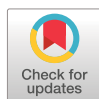

Shareable abstract (@ERSpublications)

**Respiratory syncytial virus infection in hospitalised adults with influenza-like illness was associated with poor in-hospital and midterm post-discharge outcomes, which may be worse than or similar to those of patients with influenza virus infection** <https://bit.ly/2VAsMhh>

**Cite this article as:** Descamps A, Lenzi N, Galtier F, *et al.* In-hospital and midterm post-discharge complications of adults hospitalised with respiratory syncytial virus infection in France, 2017–2019: an observational study. *Eur Respir J* 2022; 59: 2100651 [DOI: 10.1183/13993003.00651-2021].

This single-page version can be shared freely online.

Copyright ©The authors 2022. For reproduction rights and permissions contact [permissions@ersnet.org](mailto:permissions@ersnet.org)

Received: 3 March 2021  
Accepted: 6 July 2021

## Abstract

**Objectives** The purpose of this study was to describe the clinical characteristics and in-hospital and post-discharge outcomes of respiratory syncytial virus (RSV) infection among adults hospitalised with influenza-like illness (ILI) and compared against patients admitted for influenza.

**Methods** Adults hospitalised with ILI were prospectively included from five French university hospitals over two consecutive winter seasons (2017/2018 and 2018/2019). RSV and influenza virus were detected by multiplex reverse transcription PCR on nasopharyngeal swabs. RSV-positive patients were compared to RSV-negative and influenza-positive hospitalised patients. Poisson regression models were used to estimate the adjusted prevalence ratio (aPR) associated with in-hospital and post-discharge outcomes between RSV and influenza infections. The in-hospital outcome was a composite of the occurrence of at least one complication, length of stay  $\geq 7$  days, intensive care unit admission, use of mechanical ventilation and in-hospital death. Post-discharge outcome included 30- and 90-day all-cause mortality and 90-day readmission rates.

**Results** Overall, 1428 hospitalised adults with ILI were included. RSV was detected in 8% (114 of 1428) and influenza virus in 31% (437 of 1428). Patients hospitalised with RSV were older than those with influenza (mean age 73.0 *versus* 68.8 years,  $p=0.015$ ) with a higher frequency of chronic respiratory or cardiac disease (52% *versus* 39%,  $p=0.012$ , and 52% *versus* 41%,  $p=0.039$ , respectively) and longer

hospitalisation duration (median stay 8 *versus* 6 days,  $p < 0.001$ ). Anti-influenza therapies were less prescribed among RSV patients than influenza patients (20% *versus* 66%,  $p < 0.001$ ). In-hospital composite outcome was poorer in RSV patients (aPR 1.5, 95% CI 1.1–2.1) than in those hospitalised with influenza. No difference was observed for the post-discharge composite outcome (aPR 1.1, 95% CI 0.8–1.6).

**Conclusion** RSV infection results in serious respiratory illness, with worse in-hospital outcomes than influenza and with similar midterm post-discharge outcomes.
